# Supplementary material
Source: publisher figshare collection journal article supplement (https://karger.figshare.com/ndownloader/files/26741942)
Supplement: Supplementary file 1 [file 26741942]

**
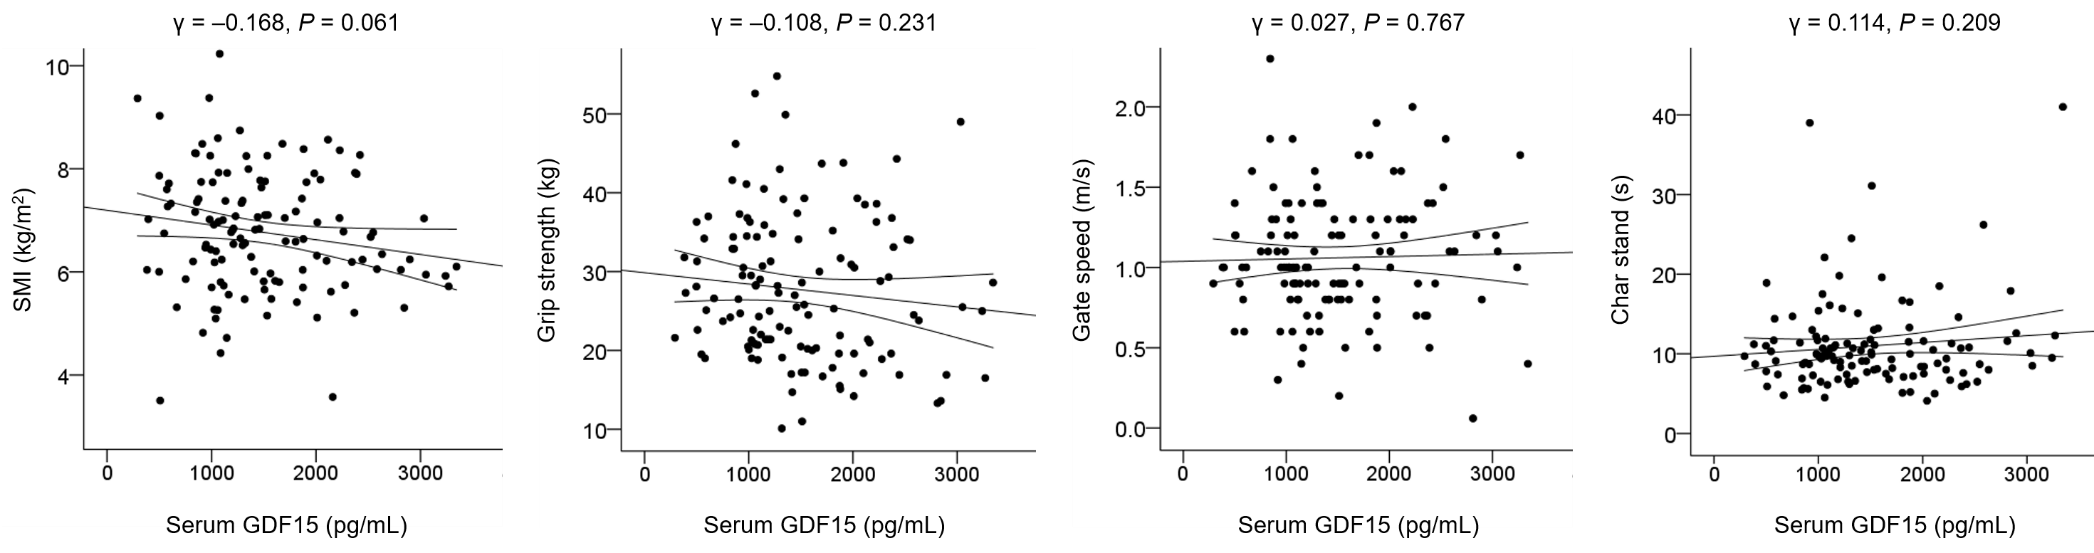
**

**Supplementary Fig. 1.** Pearson’s correlation coefficient with scatter plots for the association between age and serum GDF15 levels. *Statistically significant value. The SPPB score was not included in these analyses due to its skewed distribution. SMI, skeletal muscle mass index; SPPB, short physical performance battery.
